# Supplementary material for: The effects of Pilates vs. aerobic training on cardiorespiratory fitness, isokinetic muscular strength, body composition, and functional tasks outcomes for individuals who are overweight/obese: a clinical trial
Source: PeerJ. 2019 Feb 28;7:e6022. doi: 10.7717/peerj.6022 (PMC6397755; doi:10.7717/peerj.6022)
Supplement: Supplemental Information 1 [file peerj-07-6022-s001.xlsx]

## Sheet: Raw data
Volunteer	FOSTER	FCMD	PR - IMC (BMI)	PO - IMC (BMI)	PR - DXA -MT (kg)	PO - DXA - MT (kg)	PR - DXA -% fat mass	PO - DXA -% fat mass	PR - DXA - lean mass (kg)	PO - DXA - fat mass (kg)	PR - Waist circumference (cm)	PO - Waist circumference (cm)	PR - Hip circumference (cm)	PO - Hip circumference (cm)	PR - Abdominal test (no. of repetitions)	PO - Abdominal test (no. of repetitions)	PR - Trunk extensor test (sec)	PO - Trunk extensor test (sec)	PR - Flexibility test (cm)	PO - Flexibility test (cm)	PR - Chair test (sec)	PO - Chair test (sec)	PR - Stair test (sec)	PO - Stair test (sec)	pre PT/BW ext 60 D	pre PT/BW ext 60 ND	pre PT/BW ext 240 D	pre PT/BW ext 240 ND	pre PT/BW fl 60 D	pre PT/BW fl 60 ND	pre PT/BW fl 240 D	pre PT/BW fl 240 ND	pos PT/BW ext 60 D	pos PT/BW ext 60 ND	pos PT/BW ext 240 D	pos PT/BW ext 240 ND	pos PT/BW fl 60 D	pos PT/BW fl 60 ND	pos PT/BW fl 240 D	pos PT/BW fl 240 ND	PR -VT1 -VO2/KG	PO - VT1 - VO2/KG	PR - VT1 - HR	PO - VT1 - HR	PR - VT2 - VO2/KG	PO - VT2 - VO2/KG	PR - VT2 - HR	PO - VT2 - HR	PR - VO2/KG - MAX
1	120	86.6	29.4281	28.421	71.4	69.9	49.8	47.9	34.47	34.98	95	87	107	105	35	43	144	181	28	33	20	18.17	22.57	22.37	109.726	93.1507	81.5068	61.7808	74.2466	60	49.726	44.7945	129.041	121.644	90.8219	83.5616	94.6575	80.8219	64.3836	56.8493	14.33	22.67	114	143	18.12	28.95	128	159	24.21
2	120	95	29.3653	29.5149	76.9	77.2	51.8	49.3	35.67	37.75	106	102	109	109	28	47	71	136	0	5	21.81	21.05	19.13	19.05	135.287	117.07	70.3185	69.4268	78.3439	63.949	54.7771	41.6561	135.541	134.14	80.5096	79.2357	58.4713	61.2739	55.7962	60	14.43	16.53	108	119	18.7	22.27	131	148	23.99
3	180	81	28.4485	28.6011	92	92.5	32.3	32.1	60.27	60.78	109	104	107	103	23	32	36	81	39	39.5	21.7	18.25	21.23	19.58	238.841	225.751	142.489	127.468	153.219	119.957	110.73	74.1416	250.751	203.541	144.957	129.936	126.18	102.039	77.897	75.6438	17.98	24.57	113	142	22.46	29.5	137	152	30.02
4	240	98	34.5703	33.2163	87	85	55.1	54.5	37.866	37.45	113	102	122	121	39	51	74	140	36.5	38	24	18	22	22	121.017	126.328	76.0452	68.3616	60.339	50.7345	42.1469	36.7232	124.407	112.994	73.4463	68.0226	64.4068	67.7966	46.2147	36.8362	17.82	17.43	98	115	20.55	21.22	106	127	20.49
5	420	85	28.7798	28.5605	73.1	73	49.1	50.8	36.027	34.69	95	95	114	114	34	37	86	80	27	30	29	28.81	27	26.88	105.898	99.0617	60.1877	56.1662	58.5791	52.9491	36.8633	34.5845	136.863	92.8954	77.0777	56.3003	57.1046	56.8365	31.2332	35.1206	16.28	16.6	107	118	23.67	17.69	140	128	25.94
6	180	82	35.8459	35.2984	96.1	92.9	45.1	41.1	51.42	53.31	118	115	119	115	43	50	117	149	15.5	20	20	19	26	21.65	205.979	196.907	112.577	117.113	94.5361	91.8557	67.8351	55.8763	215.567	190.206	12.0619	75.6701	95.8763	96.0825	56.8041	54.433	17.48	17.96	124	121	22.16	18.79	145	137	23.2
7		78	29.0564	29.1317	76.2	75.7	44.9	43.9	40.61	41.069	97	96	110	104	36	46	180	240	32.5	36	27	12	27	22	115.933	121.632	93.5233	85.6218	54.7927	58.4197	64.3782	48.1865	129.145	115.415	100	82.9016	65.285	60.7513	56.4767	47.4093
8	180	85	28.5536	27.6414	66.5	66.8	47.1	49	34.13	33.09	88	87	111	110	33	44	52	107	27	28	28	22	23	20	69.6793	64.5773	38.484	30.758	29.8834	36.1516	18.6589	18.0758	123.032	105.394	76.9679	67.0554	54.9563	60.9329	43.0029	39.3586
9		87	30.1432	29.9404	72.7	72.4	46.2	43.3	37.65	39.549	94	92	108	104	32	47	73	76	37.5	39	25	17	23	20	171.332	146.03	91.5209	89.0983	72.6783	82.7725	54.5087	60.0269	156.662	135.262	86.1373	76.716	85.1952	93.6743	58.681	59.354
10	180	81	27.6312	27.5019	74.7	75.7	45.2	46.3	39.396	39.104	96	95	111	110	28	43	127	240	12	17	28	21.53	28	27.65	131.593	135.77	62.7937	68.5379	72.4543	64.4909	42.1671	39.9478	148.433	127.937	72.846	78.5901	77.8068	70.8877	59.2689	45.3003	12.55	14.88	95	111	18.49	18.69	113	120	23.89
11	240	80	27.9832	27.3148	66.4	66.3	52.2	44.1	30.53	35.73	96	94.5	106	106	31	47	151	240	17.5	26	24	16.03	23	19.4	120.264	143.612	95.4479	93.5389	44.6402	66.9604	49.1924	53.4508	141.997	17.1806	90.8957	99.5595	75.6241	79.1483	56.8282	56.094	18.95	16.42	X	105	25.23	26.19	130	153	26.89
12	120	95	39.2531	39.1253	84.2	84.6	57.1	56.3	35.05	35.87	124	122.5	128	127	18	30	86	149	12	19	26	20	28	26.57	100	84.5433	62.7635	60.4215	44.7307	42.1546	31.4988	27.7518	87.2365	64.1686	59.6019	57.7283	47.6581	37.3536	36.4169	29.6253	11.25	18	93	144	13.8	20.8	137	155	16.56
131	180	87	34.9577	33.4562	85.8	83.2	56.1	54.6	36.57	37.01	109	105.5	114	112	28	37	79	157	11	16.5	25	19.67	23	22.28	107.991	120.89	58.6758	70.2055	53.7671	49.3151	32.6484	30.3653	117.237	110.959	63.0137	71.2329	53.8813	52.5114	48.8584	49.5434	12.04	14.58	85	105	14.22	16	109	116	14.82
4	180	80	41.4481	42.4581	108.8	111.1	60.8	56.1	41.34	47.561	119	120	149	149.5	31	40	57.13	76	34	35	24.9	19.48	22.06	19.3	121.931	90.9747	64.6209	57.852	40.1625	40.4332	40.5235	29.5126	131.498	110.199	59.296	53.8809	48.8267	52.1661	45.5776	33.574	16.02	14.86	135	134	18	17.31	140	147	19.83
15	240	80	33.2422	33.3594	83.5	83.9	58	54.9	33.82	36.55	111	110	120	119	31	48	81	145	10	14	26.77	21.99	26.8	23.92	151.586	141.598	76.1457	69.8002	57.3443	65.0999	42.4207	39.6005	155.817	149.941	83.1962	77.0858	56.2867	70.3878	53.584	44.1833	13.67	23.34	128	150	18.6	24.83	153	167	22.98
16	180	91	35.2277	34.6705	86.9	86.1	50.8	50.8	41.55	41.191	115	112	121	121	32	47	73	103	28	31.5	18	18	27	25	129.605	132.429	83.2768	75.0282	74.1243	76.4972	53.6723	51.0734	128.588	125.085	84.2938	74.0113	75.8192	72.2034	84.6328	64.4068	16.81	19.99	118	121	21.42	22.37	120	126	26.9
17	120	87	29.2746	29.2378	78.4	78.3	52.7	51.2	36.03	37.213	108	107.5	110.5	110	31	38	64	98	13	16	26.38	23.2	33.09	29.77	128.231	105.395	53.1995	43.9147	107.905	45.5458	35.5082	27.729	130.364	114.931	63.6136	40.9034	58.7202	57.34	36.1355	34.5044	12.12	16.68	102	125	12.24	18.85	112	138	12.21
18	120	97	31.3603	30.2399	75.8	73.9	52.6	51	34.62	34.88	103	96.5	116.5	112.5	32	40	70	95	15	19	24	20.1	24	23.6	141.397	150.323	75.4204	82.7943	78.1371	80.9832	43.2083	46.9599	139.974	142.432	72.9625	80.4657	130.272	76.4554	46.4424	42.4321	16.21	14.09	118	105	20.25	19.72	150	137	21.36
19	240	94	36.3821	36.4555	89.5	90.6	50.9	50.4	42.856	43.8	117.5	114.5	121	119	33	40	67	79	19	23	29	18	27	24	111.816	108.206	60.8315	54.1575	62.9103	62.2538	39.3873	40.0438	111.707	98.0306	63.2385	57.221	59.081	59.9562	37.965	38.2932	11.71	14.2	109	127	16.81	15.39	128	142	17.83
20	180	83	30.1926	29.9609	75.7	75.6	52.4	49.3	34.882	37.13	104	103	113	111	37	39	187	127	28.5	30	19	18	23	21	133.463	135.019	72.7626	73.93	60.7004	61.6083	37.4838	43.7095	125.032	143.839	77.9507	78.3398	98.9624	62.5162	47.0817	39.9481	16.07	16.06	105	103	20.48	22.38	124	119	29.83
21	240	83	31.3523	31.3105	81.8	82.1	56	56.2	34.803	34.85	97	98	113.5	112	24	25	41	49	16	30	24	22	29	23	93.7575	100	64.5858	66.3866	41.1765	63.0252	32.1729	41.0564	92.9172	87.0348	67.1068	71.1885	40.2161	43.9376	28.9316	30.012	11.58	11.91	100	110	17.57	17.86	125	127	18.36
22	180	85	29.0131	29.195	79.4	81.1	54.4	48.6	35.16	40.48	108	106	115	115	16	45	53	98	13	18	28		31		89.312	98.4029	70.2703	70.1474	32.1867	43.2432	29.9754	35.1351									17.85		126		24.19		147		27.39
23	420	123	34.2969	34.1797	86.7	86.1	51.9	50.5	40.35	41.246	114	114	116	116	35	48	197	240	22	25	28	21.71	24	20.6	130.068	99.4305	83.1435	75.2847	50.2278	50.4556	41.4579	45.1025	138.041	92.9385	77.221	42.1412	50.5695	56.2642	45.1025	34.3964	19.04	22.27	122	139	24.78	23.79	150	145	27.94
24	480	134	29.883	28.8415	73	70.7	48.6	48	36.17	35.39	101	96	108	106	38	36	183	168	23	21	18	18.3	20	19.55	121.984	134.182	79.6247	81.2332	75.067	63.1367	50.6702	45.4424	144.37	132.172	81.5013	83.7802	72.9223	67.1582	51.6086	47.9893	16.27	18.97	128	141	21.1	24.84	155	174	25.34
25	120	130	33.8721	33.795	86.4	85.2	52.7	52.8	39.45	38.81	112	100	120	120	31	45	129	153	32	30.5	22.7	17.69	19.19	17.92	161.845	129.043	88.3827	71.8679	78.7016	88.4966	59.6811	58.4282	111.276	130.296	70.5011	72.779	79.6128	86.1048	52.8474	58.9977	17.28	17.74	115	136	23.26	25.94	153	166	26.94
26	180	113	29.2239	28.3185	56.3	55.9	42.2	41.5	31.14	31.31	89.5	80	108	105.5	42	44	99	137	35	35	27.5	18.79	27.7	22.9	133.219	108.778	86.0585	98.2788	48.7091	45.0947	51.9793	54.7332	125.129	77.6248	98.7952	83.9931	48.8812	40.2754	57.6592	47.5043	20.63	21.01	116	115	26.44	24.1	145	132	33.56
27	180	122	30.6339	30.2926	78.6	78.7	46.5	46.3	40.78	40.97	103	103	108	108	34	39	55	53.86	14.5	15.5	24	23.08	32	38.95	98.7484	70.2128	77.597	67.4593	68.4606	21.2766	44.1802	41.3016	108.135	107.009	81.602	86.6083	67.7096	53.1915	55.194	51.5645	18.43	20.82	122	132	21.18	24.32	122	145	23.76
28	300	106	25.1031	25.2936	59.8	60.5	31.8	32.1	39.19	39.46	92	92	94	95	32	35	112	76	16	20	27	18.56	26	22.05	161.285	153.871	109.061	92.4217	92.5865	78.2537	66.7216	65.8979	161.285	137.232	120.758	87.9736	90.939	78.4185	71.1697	62.4382	18.65	18.73	112	105	22.64	20.64	117	110	26.48
29	300	138	29.9725	29.2011	80.6	78.4	41.1	40.5	45.64	44.8	106.6	102	103	101.5	33	40	84	95	18	22	16	21	20	24.4	199.877	218.505	116.054	128.186	191.789	95.4657	56.8627	54.6569	194.118	210.172	112.868	124.632	96.6912	98.7745	54.7794	54.6569	24.26	25.58	128	138	35.08	33.81	159	155	37.22
30	360	124	34.6306	34.7555	81.9	81.9	46.4	44	42.65	44.68	119	114	121	120	32	45	121	110	16	17	21	22.35	25	21.31	134.375	129.207	82.6923	73.0769	72.7163	64.0625	40.3846	43.0288	143.75	131.13	83.0529	81.7308	77.2837	67.0673	56.25	37.0192	15.57	20.9	123	140	18.33	25.09	143	160	22.01
31	180	128	29.2897	28.9592	79.5	78.2	51.4	52.9	37.2	35.35	98.5	93	116	115	39	34	64	101	39	38	22.7	18.98	24.6	22.42	150.555	138.594	80.8878	72.2565	65.598	63.7485	56.4735	76.5721	156.72	150.185	78.545	79.6547	76.5721	69.4205	47.4723	66.7078	20.24	21.66	132	138	21.82	24.38	142	148	25.07
32	240	129	31.8835	31.4672	74.7	74.2	47	45.6	38.28	39.06	105	101	109.5	108	28	41	114	142	30	31	19	17.2	22	20.74	192.167	183.681	102.611	105.222	92.0366	72.1932	52.611	46.0836	201.697	196.084	113.446	107.441	90.6005	90.3394	63.1854	54.4386	17.44	23.83	131	146	20.3	26.73	162	158	22.05
33	300	143	33.6668	34.3767	98.3	100.1	43.1	43	54.12	55.26	112	110	113	112	39	48	97	89	25	26	24	20.01	25	24.32	138.153	114.558	93.1727	79.2169	57.9317	50.2008	44.1767	42.5703	105.723	117.57	75.6024	84.739	47.8916	49.5984	45.7831	39.9598	18.9	17.09	126	119	21.28	21.89	140	144	26.58
34	180	111	26.8327	27.6134	64.5	66.1	41.7	40.5	36.19	37.89	98.5	96	104	102.5	38	40	124	208	9	13	23.86	20.25	28.34	23.85	142.726	134.303	82.2358	73.0475	73.66	89.2802	56.3553	65.8499	153.292	145.942	87.2894	72.4349	100.919	86.83	75.1914	62.0214	18.2	18.62	116	107	21.81	22.95	126	119	22.98
35	120	105	26.8302	25.9949	79.8	77.3	34.1	33	50.25	49.43	89	85	117	114	54	42	95	143	23	20	25	22.38	23	21.92	160.897	196.762	127.024	112.951	83.4371	84.6824	70.6102	63.1382	177.086	185.181	125.031	128.643	111.083	98.0075	103.861	68.8667	25.21	26.56	129	139	29.01	32.4	146	157	35.66
36	180	115	27.435	26.9996	74.5	73.4	42.1	39.8	41.19	42.28	101	100	110.5	109.5	36	37	83	184	29	30	24	23.95	23	23.11	144.312	138.228	78.3069	82.1429	60.582	53.836	48.2804	59.5238	145.635	140.873	80.4233	75.1323	59.5238	63.6243	60.3175	63.3598	19.73	23.04	114	126	23	26.3	123	144	28.16
37	360	119	25.683	25.8889	58.4	59.8	44.8	45.9	31.12	31.29	95.5	94.5	102.5	101	38	43	98	40.67	11	14	23.07	21.3	23.72	21.8	185.88	95.1827	103.654	105.98	63.4551	35.8804	44.8505	47.01	143.189	124.419	105.98	106.86	40.8638	53.9867	40.1993	48.0066	19.28	20.23	134	85	22.68	23.51	145	109	27.68
38	180	115	29.8997	29.7232	83.8	84.4	56.6	56	35	35.82	108	101	119.5	118.5	42	41	29.5	42.61	0	1	24.61	21.81	24.58	22.7	139.673	139.907	81.3302	79.8133	69.6616	53.5589	51.6919	52.9755	137.923	157.41	76.3127	78.7631	66.7445	59.1599	36.6394	35.8226	15.45	16.58	134	117	19.98	20.9	151	144	22.11
39	180	116	37.3179	37.7703	89.7	91.7	50.3	49.9	43.37	44.73	113	114.5	116	116	36	37	70	63	12	10	19.84	19.81	20.63	20.07	123.195	156.236	64.442	71.7724	65.0985	46.2801	37.3085	36.3239	144.311	115.427	72.1007	82.8228	55.6893	49.6718	46.8271	43.8731	16.99	19.87	119	142	23.77	18.97	148	143	24.29
40	120	121	33.5547	32.8125	84.9	82.5	49	50.2	41.9	39.67	100	97	121.5	121.5	34	41	83	79	24	26	21.45	20.74	23.57	20.6	139.697	140.047	88.8242	85.099	59.1385	73.4575	45.4016	48.5448	137.602	127.707	72.6426	65.0757	59.0221	70.8964	44.2375	41.7928	14.54	14.86	110	100	19.45	19.39	125	118	26.99
41	300	128	27.4018	27.3314	77.1	76.7	42.5	41.9	42.5	42.68	96	96	105	104.5	39	46	139	126	5	6	20.45	19.94	27.31	23.48	123.008	175.707	97.6864	118.38	71.4653	72.6221	59.126	46.0154	147.686	157.841	94.6015	97.1722	85.09	89.0746	55.1414	60.2828	21.91	22.82	140	150	27.87	26.66	163	162	30.1
42	252	123	29.0179	29.6556	80.6	82	50.1	50.5	38.74	39.131	96	98	115.5	116	44	46	76	111	23	27	27.49	25.76	26.77	25.41	130.281	67.7656	79.7314	58.8523	72.1612	48.9621	60.0733	51.0379	143.223	59.8291	79.3651	53.3578	62.6374	44.2002	50.7937	35.2869	17.61	15.02	150	130	20.57	21.43	172	167	22.76
43	360	142	30.3006	29.6513	82	80.5	55.2	52.9	35.52	36.62	107.5	103	116	113	32	57	103	100	27	29	17	16.58	24	21.35	165.595	164.405	95	95	74.2857	74.881	69.2857	59.6429	154.167	157.381	85	96.3095	82.8571	71.7857	55.5952	53.5714	18.5	17.85	139	122	23.32	21.55	168	144	24.85
44			32.9162	33.4899	91.5	92.6	35.4	35.7	56.92	57.48	103	103	108	108	20	28	71	69	0	0	29.02	26.13	29.71	23.67	221.678	212.418	126.035	111.765	76.2527	89.9782	49.5643	55.1198	239.542	204.902	111.874	105.664	87.3638	81.3725	51.5251	52.5054	21.35	16.43	126	108	23.72	20.84	139	130	28.57
45			34.6015	34.3863	95.8	94.7	47.1	46.2	48.845	49.15	109	109	118	118.5	36	54	75	114	39	39	20	21.97	20	20.38	204.249	187.876	123.316	117.409	120.311	118.653	76.4767	75.6477	181.347	169.948	125.596	112.435	108.083	116.58	71.399	75.8549	21.06	23.24	125	136	30.68	25.94	165	144	32.58
46			33.1322	33.0905	78.4	78.4	42.9	46.2	43.386	40.76	105	108	111	111	33	31	118	121	15	15	21	25	23	27	141.206	140.829	91.3317	98.3668	62.8141	58.1658	48.1156	49.1206	141.457	175.503	105.779	107.412	78.7688	64.196	60.0503	59.799	8.4	10.49	128	127	11.62	12.49	154	144	12.41
47			35.6128	35.7463	101.6	100.8	58.6	57.4	40.708	41.67	115	118	128.5	130	22	30	55	38	19	22	28	26	31	30	91.0506	100.778	51.3619	53.5019	47.0817	45.428	35.0195	29.2802	77.9183	83.1712	51.8482	55.7393	51.07	49.3191	34.6304	32.7821	11.77	11.01	115	118	15.87	15.12	130	138	19.75
48			37.0939	36.8	112.4	111.6	33.6	34	72.36	71.44	120	120	118	119	30	36	56	78	0.5	0.5	30.53	30.56	28.36	30.53	174.56	154.225	96.831	101.056	88.5563	96.4789	61.8838	57.9225	194.718	167.165	115.405	103.961	101.144	117.958	58.0106	68.0458	20.46	22.32	127	134	22.73	24.48	135	139	29.24
49			28.3874	29.0352	74.4	75	29.5	28.8	50.66	51.52	94	95.5	93	94	40	36	82	66	29	28	20	23.41	23	19.53	226.443	223.221	119.329	122.819	124.832	111.678	102.685	86.7114	199.195	232.752	131.544	121.342	125.638	108.456	87.1141	78.7919	19.07	19.86	113	121	24.45	26.53	144	149	28.89
50			25.974	26.0584	60.8	61	36.9	39.4	36.96	35.61	94.5	93.5	97	97	38	40	157	153	21	17.5	25	18.56	24	24.85	165.909	150.487	117.532	100.649	85.2273	88.1494	61.6883	59.2532	176.623	166.396	118.019	105.357	92.0455	86.8506	61.3636	58.7662	18.54	26.74	115	131	28.15	30.49	134	143	30.62
51			27.5055	28.0628	67.8	69.4	43.8	43	36.554	37.98	87	90	104	104	33	40	112	55	11	15	25	24	25	24	199.855	189.58	121.274	124.023	80.4631	82.1997	47.3227	54.848	183.213	176.556	120.984	121.274	73.2272	74.6744	44.7178	40.6657	18.09	19.78	134	142	23.69	20.68	158	155	27.52
52			29.8462	29.2746	71.6	70.6	46.9	44.2	36.59	37.95	92	91	108	107	25	25	78	53	17	16	23	23	25	26	164.569	159.097	78.1122	82.3529	63.0643	54.5828	43.3653	47.8796	152.668	131.874	76.881	72.9138	65.3899	47.606	47.3324	38.0301	17.79	17.65	125	124	22.26	20.32	145	133	24.98
53			33.1961	33.4312	102.1	102.5	44.6	48.5	54.71	51.231	114	116.5	111	112	34	33	92	95	1	1.5	27	28	22	23	155	142.212	109.231	96.3462	77.3077	65.2885	44.3269	42.3077	153.173	154.423	122.981	126.154	84.5192	81.25	50.1923	61.5385
54			39.7429	39.5592	102.5	104.4	51.6	51.3	48.566	49.642	122	122	130	130	34	36	80	49.44	29	29.5	19	23	23	23	165.989	153.604	103.974	95.1017	64.8799	54.2514	50.8318	51.6636	137.431	127.542	104.713	102.495	55.268	52.7726	50	48.244	17.74	20.57	128	145	23.87	22.53	160	155	25.03
55			26.1577	26.398	64.9	64.5	44.8	43	34.39	35.28	95	95.5	101	101	40	38	95	88	8	8	17.09	18.97	24.65	25.16	178.714	155.283	98.1623	93.2619	90.3522	90.0459	62.4809	58.9587	173.507	204.9	100.613	135.222	86.2175	67.5345	59.4181	46.2481	24.07	20.32	137	124	25.88	24.45	149	146	32.44
56			31.088	31.2851	76.4	76.9	55.1	56.2	32.21	32.67	106	105.5	106.5	106.5	30	36	94	94	19	19.5	22.65	21.26	25	24.35	123.047	100.512	76.1844	70.8067	69.7823	68.5019	44.4302	54.1613	127.273	117.926	78.3611	73.2394	76.0563	67.6056	48.7836	47.2471	14.17		132		15.43		137		18.06
57			27.0282	26.986	63.5	63.5	37.2	36.8	38.25	38.53	91	90	102	102	27	30	123		26	26	28.07	21.39	19.48	22.29	204.992	201.248	114.197	118.877	101.56	105.46	62.4025	67.3947	212.324	203.12	120.749	131.669	114.041	112.324	65.5226	75.039	22.27	20.34	157	135	25.75	25.99	173	173	30.03
58			28.183	28.1441	70.4	70.9	46.6	48.3	36.19	35.28	97	97	107	108	35	31	86	113	38	37	22	21.31	20	25	140.083	137.879	86.9146	82.2314	68.1818	65.5647	57.438	56.4738	135.675	127.686	85.124	83.0579	76.0331	71.4876	53.168	52.6171	19.03	19.54	118	133	24.18	23.82	137	142	26.04
59			28.6328	29.2969	71.9	73.6	45.7	46.6	37.41	37.79	100	100	105.5	106	39	42	73	73	27	28	17.56	16.86	21	18.56	127.012	135.198	106.685	97.5443	60.9823	37.9263	40.5184	39.0177	162.756	142.974	117.872	108.731	61.9372	51.4325	60.573	56.6166	15.99	17.77	126	123	19.24	20.15	140	146	24.82
60			27.7616	28.0157	74.9	75.4	49.3	49.3	36.78	36.98	106	105	107	107	27	39	86	203	23	20	17.51	19.5	19.03	20.05	174.641	157.386	87.5817	81.8301	69.1503	74.5098	47.9739	48.4967	150.98	162.484	93.0719	84.8366	57.6471	56.0784	55.6863	36.0784	17.21	20.57	121	129	19.08	22.89	135	143	23.58
[truncated: 7 more columns]
